# Supplementary figures and images for: Soybean Variety Saedanbaek Confers a New Resistance Allele to Phytophthora sojae
Source: MDPI journal article supplement (doi:10.3390/plants12233957), 2023-11-24

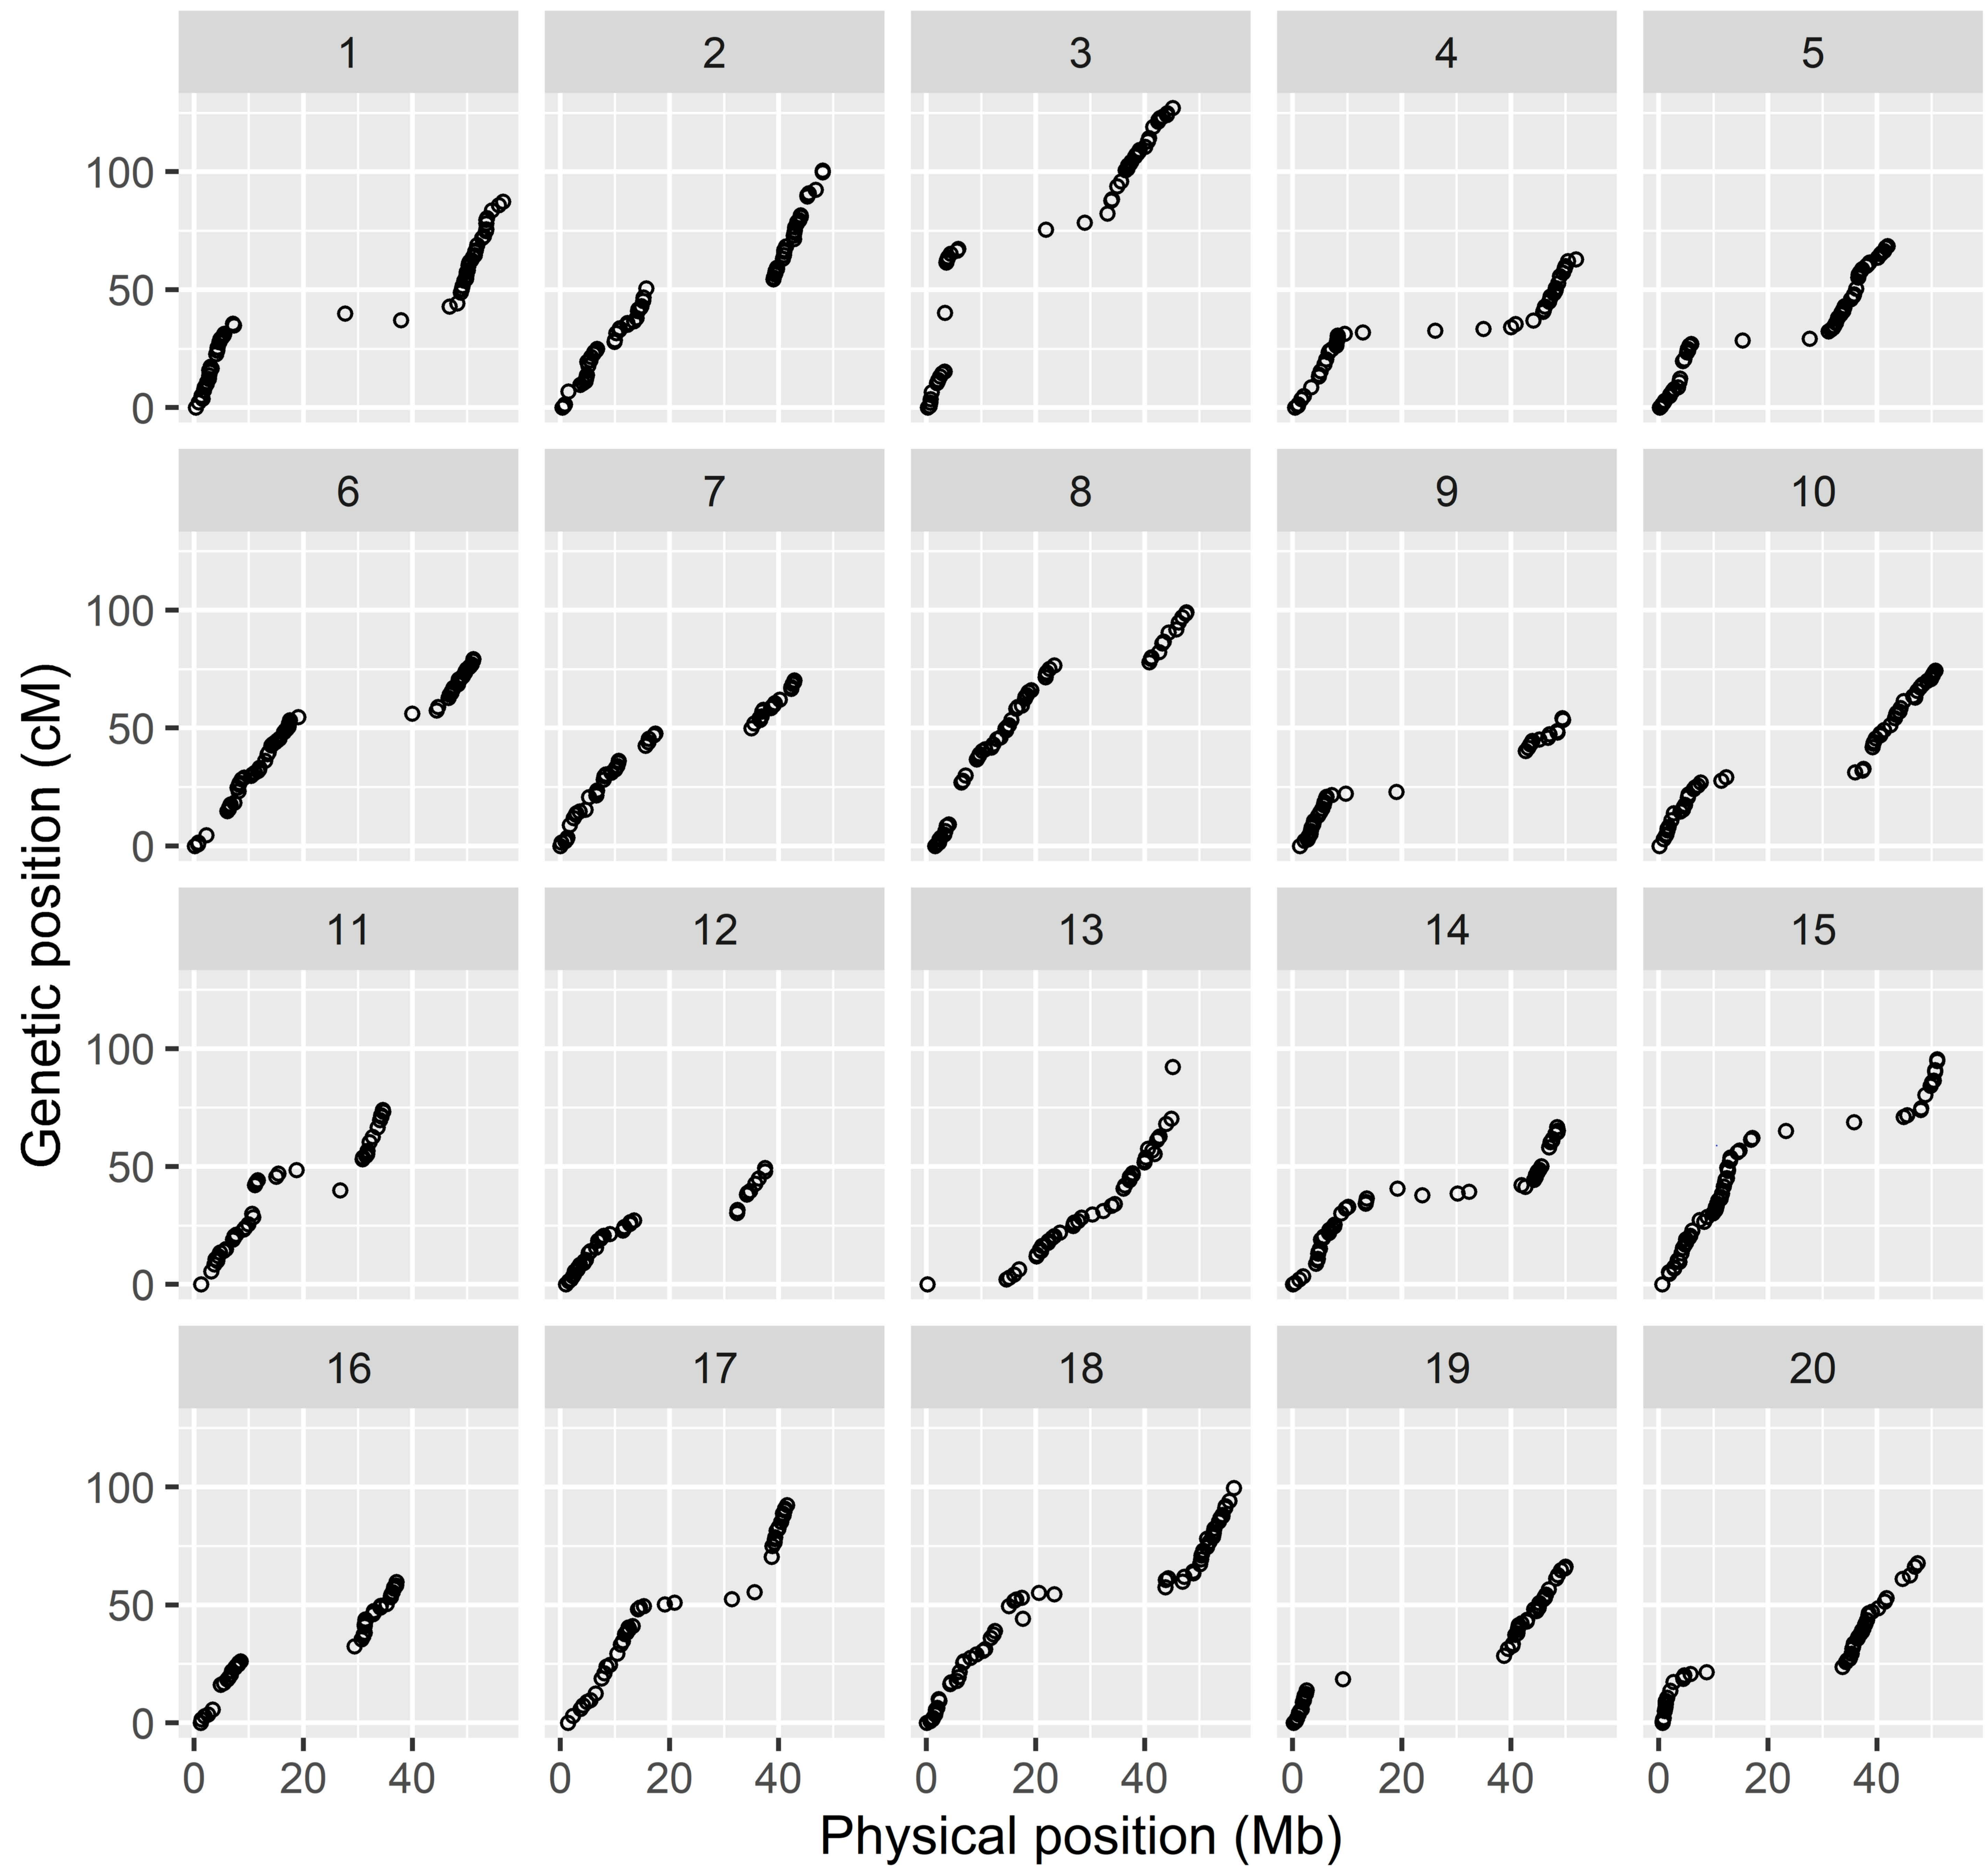

**Figure S1.** Collinearity between genetic (cM) and physical (Mbp) positions of the mapped SNPs.

Supplement: s1 [file s1]
